# Supplementary material for: Discovery of a Novel Multi-Strains Probiotic Formulation with Improved Efficacy toward Intestinal Inflammation
Source: Nutrients. 2020 Jun 30;12(7):1945. doi: 10.3390/nu12071945 (PMC7400193; doi:10.3390/nu12071945)
Supplement: Supplementary file 1 [file nutrients-12-01945-s001.pdf]

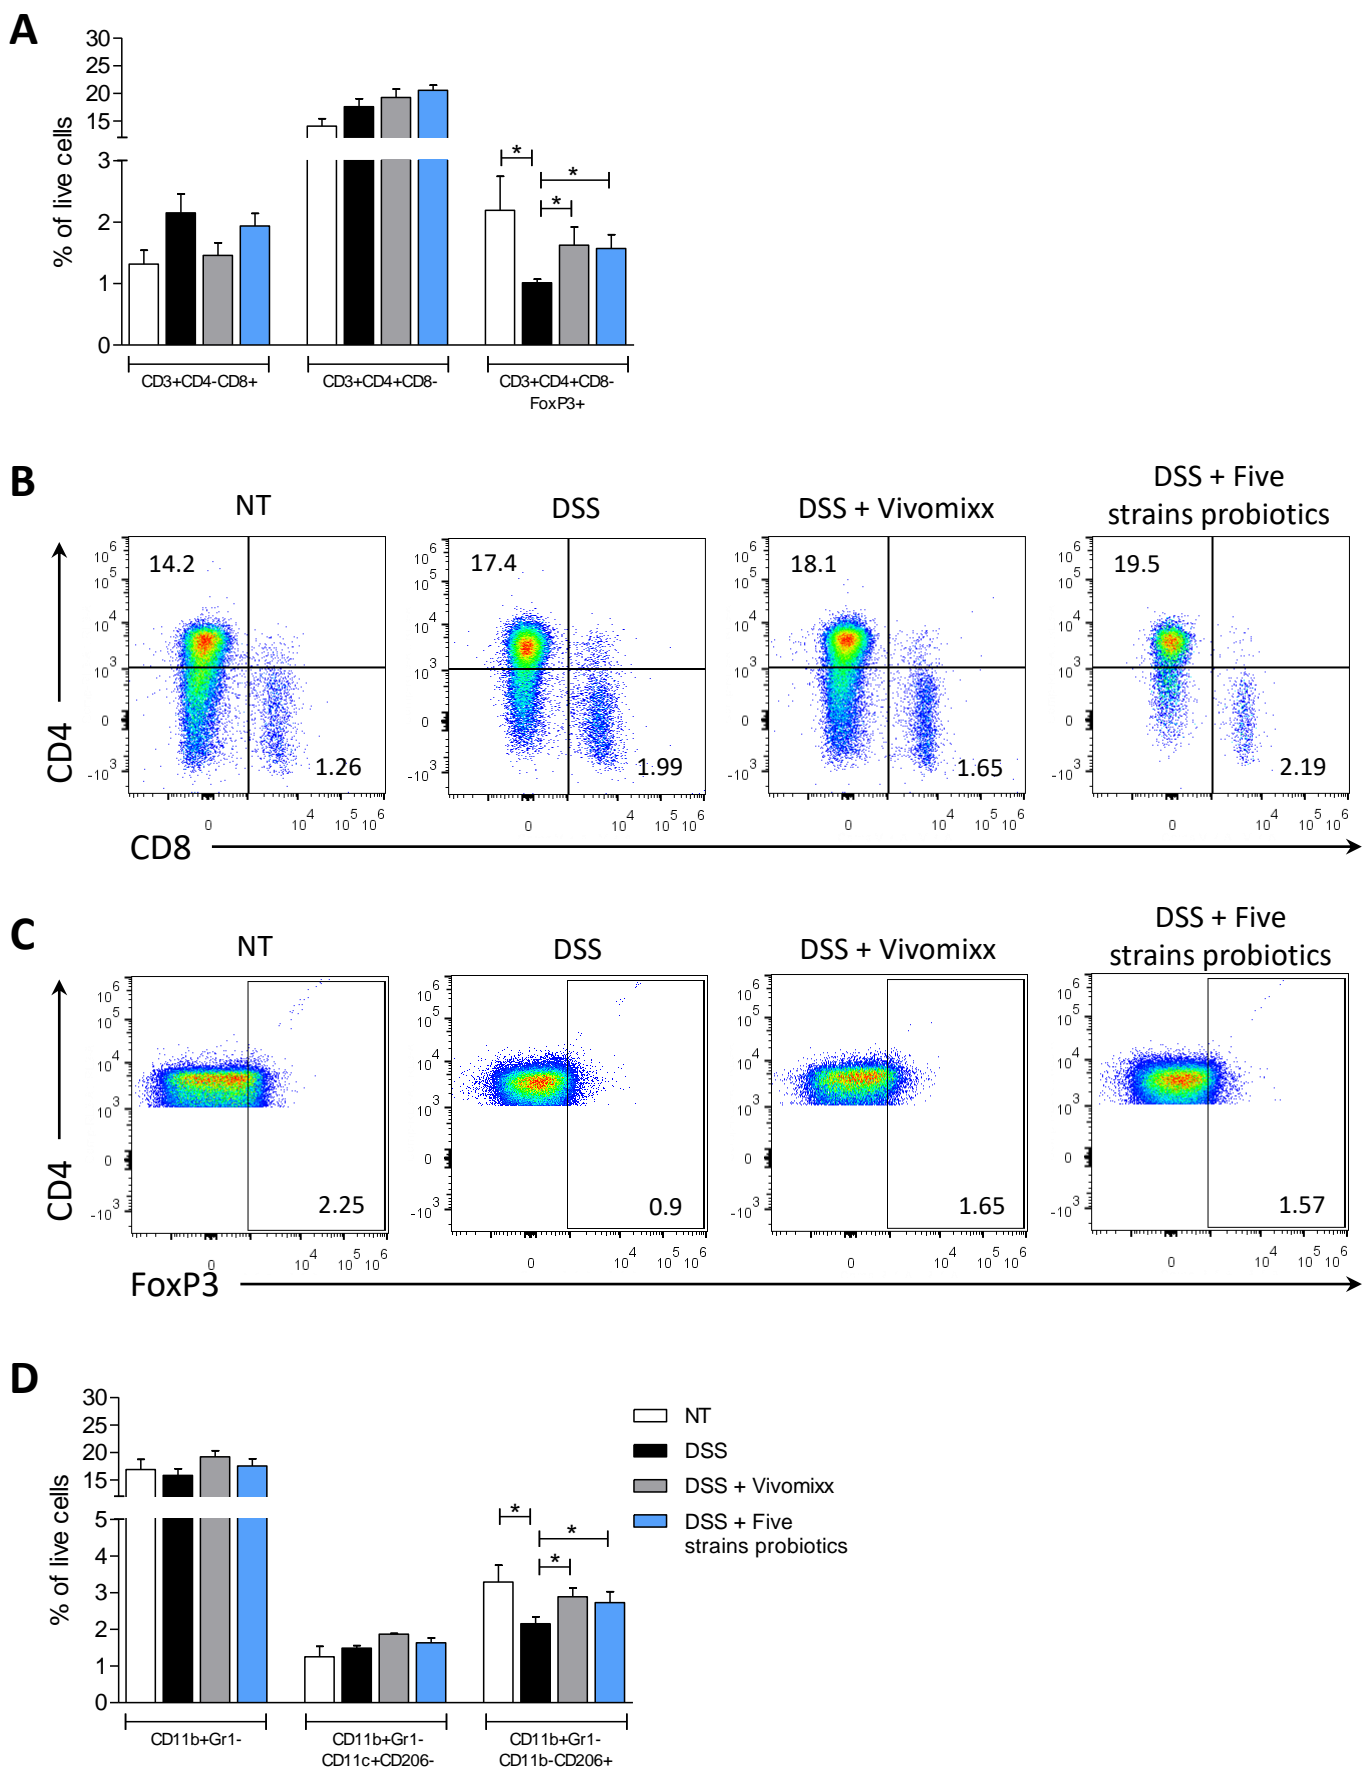

**Figure S1.**

**Figure S1.** BALB/c mice were treated with DSS in drinking water for two cycles of 7 days each and then administered with vehicle or probiotics formulations by gavage from day 4 to the end of the experiment. Colon samples were used to perform a detailed characterization of cells composition of colonic *lamina propria* by IC-FACS analysis. Data shown are frequency of CD3<sup>+</sup>CD4<sup>+</sup>CD8<sup>+</sup> T cells, CD3<sup>+</sup>CD4<sup>+</sup>CD8<sup>-</sup> T helper cells, Treg cells (CD3<sup>+</sup>CD4<sup>+</sup>CD8<sup>-</sup>FoxP3<sup>+</sup>) (**A**) and flow cytometry analysis of CD4 and CD8 expression in CD3<sup>+</sup> T cells (**B**), and FoxP3 expression in CD3<sup>+</sup>CD4<sup>+</sup>CD8<sup>-</sup> T helper cells (**C**) derived from colonic *lamina propria*. Frequency of total macrophages CD11b<sup>+</sup>Gr1<sup>-</sup>, M1 (CD11b<sup>+</sup>Gr1<sup>-</sup>CD11c<sup>+</sup>CD206<sup>-</sup>) and M2 (CD11b<sup>+</sup>Gr1<sup>-</sup>CD11c<sup>-</sup>CD206<sup>+</sup>) macrophages subpopulation derived from colonic *lamina propria* (**D**). Results are the mean  $\pm$  SEM of 7-11 mice per group. \*p < 0.05.
